# Supplementary material for: Facile hydrothermal synthesis and improved photocatalytic activities of Zn2+ doped Bi2MoO6 nanosheets
Source: Royal Society of Chemistry journal article supplement (doi:10.1039/c6ra06972j), 2016-01-01
Supplement: c6ra06972j1.pdf [file c6ra06972j1.pdf]

## Electronic supplementary information

### Facile hydrothermal synthesis and improved photocatalytic activities of Zn<sup>2+</sup> doped Bi<sub>2</sub>MoO<sub>6</sub> nanosheets

Xiang-Biao Zhang<sup>a</sup>, Lei Zhang<sup>\*b,c</sup>, Jin-Song Hu<sup>a</sup> and Xin-Hua Huang<sup>\*b</sup>

**Table S1** The calculated cell parameters of pure Bi<sub>2</sub>MoO<sub>6</sub> (S1) and doped Bi<sub>2</sub>MoO<sub>6</sub> samples with different Zn<sup>2+</sup> content (S2, S3 and S4).

| Samples   | The cell parameters |                |               |
|-----------|---------------------|----------------|---------------|
|           | a (Å)               | b (Å)          | c (Å)         |
| <b>S1</b> | <b>5.4958</b>       | <b>16.2376</b> | <b>5.4883</b> |
| <b>S2</b> | <b>5.4866</b>       | <b>16.1982</b> | <b>5.4773</b> |
| <b>S3</b> | <b>5.4729</b>       | <b>16.1331</b> | <b>5.4609</b> |
| <b>S4</b> | <b>5.4697</b>       | <b>16.0292</b> | <b>5.4416</b> |

<sup>a</sup>School of Chemical Engineering, Anhui University of Science and Technology, Huainan 232001, P. R. China

<sup>b</sup>Laboratory of Multiscale Materials and Molecular Catalysis, School of Materials Science and Engineering, Anhui University of Science and Technology, Huainan, Anhui 232001, P. R. China

<sup>c</sup> State Key Laboratory of Coordination Chemistry, School of Chemistry and Chemical Engineering, Nanjing University, Nanjing 210093, P. R. China

E-mail: yutian1224@126.com; [hxb0317@hotmail.com](mailto:hxb0317@hotmail.com)

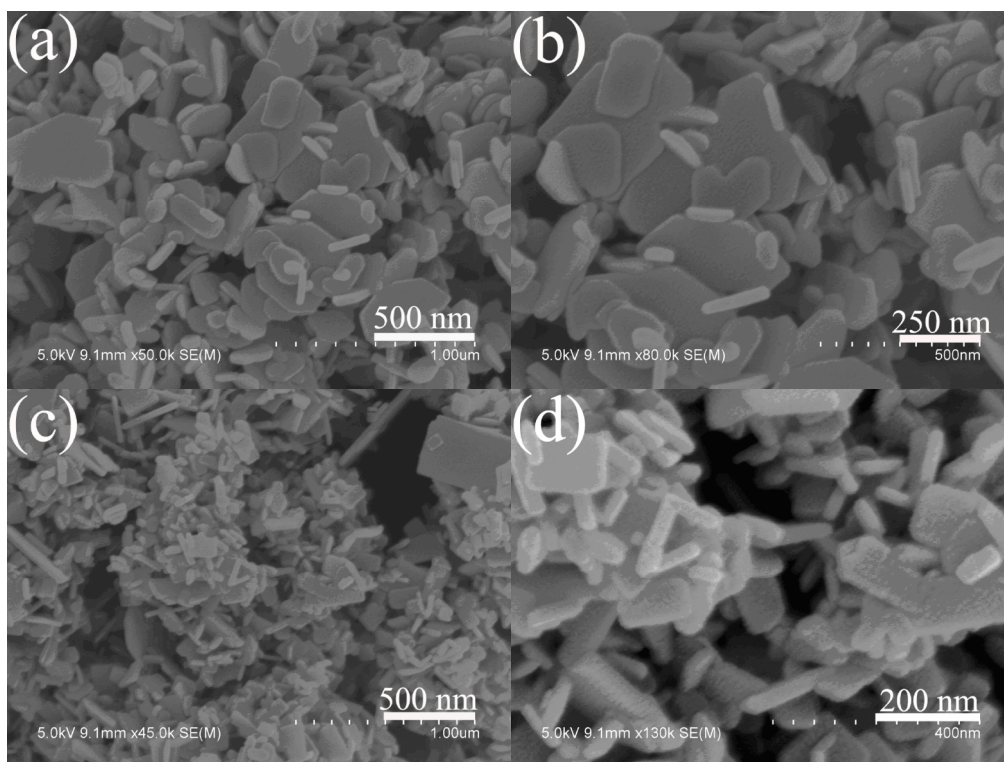

**Fig. S1** SEM images of doped  $\text{Bi}_2\text{MoO}_6$  samples with different  $\text{Zn}^{2+}$  content prepared at  $180\text{ }^\circ\text{C}$  for 24 h: (a, b) S2 and (c, d) S4.

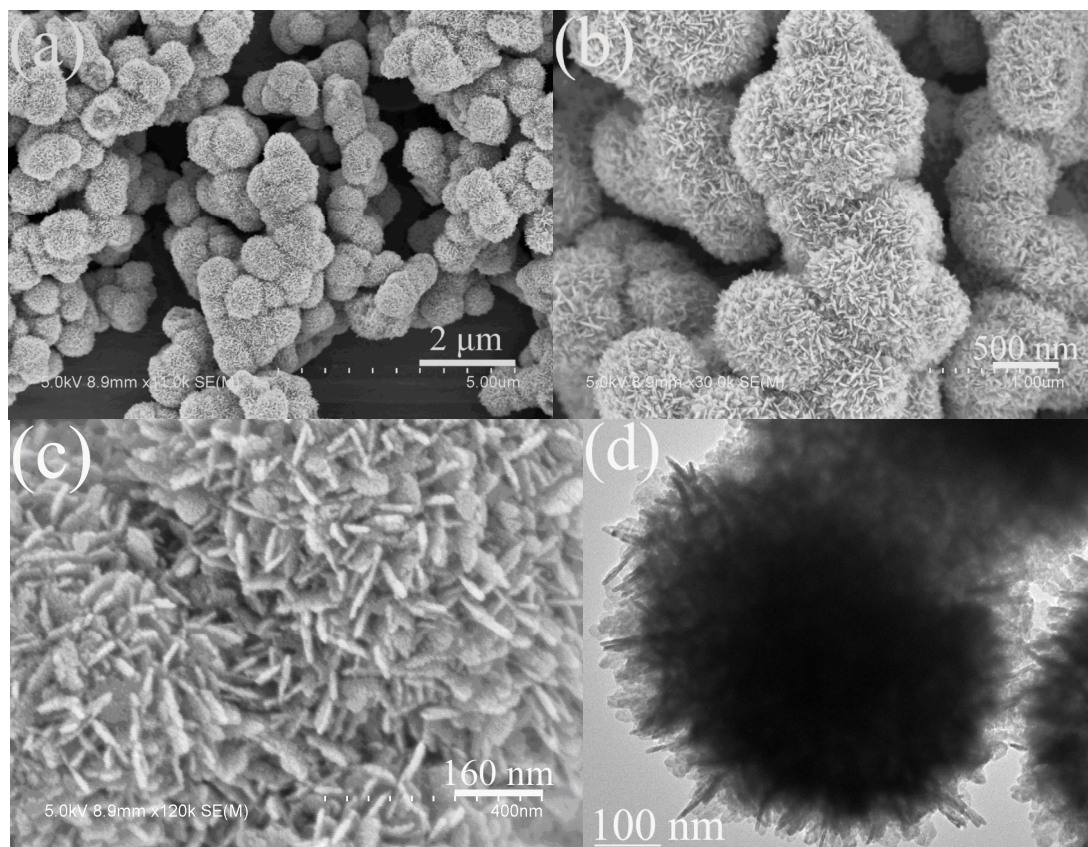

**Fig. S2** SEM (a-c) and TEM images (d) of the as-obtained pure  $\text{Bi}_2\text{MoO}_6$  sample (S1).

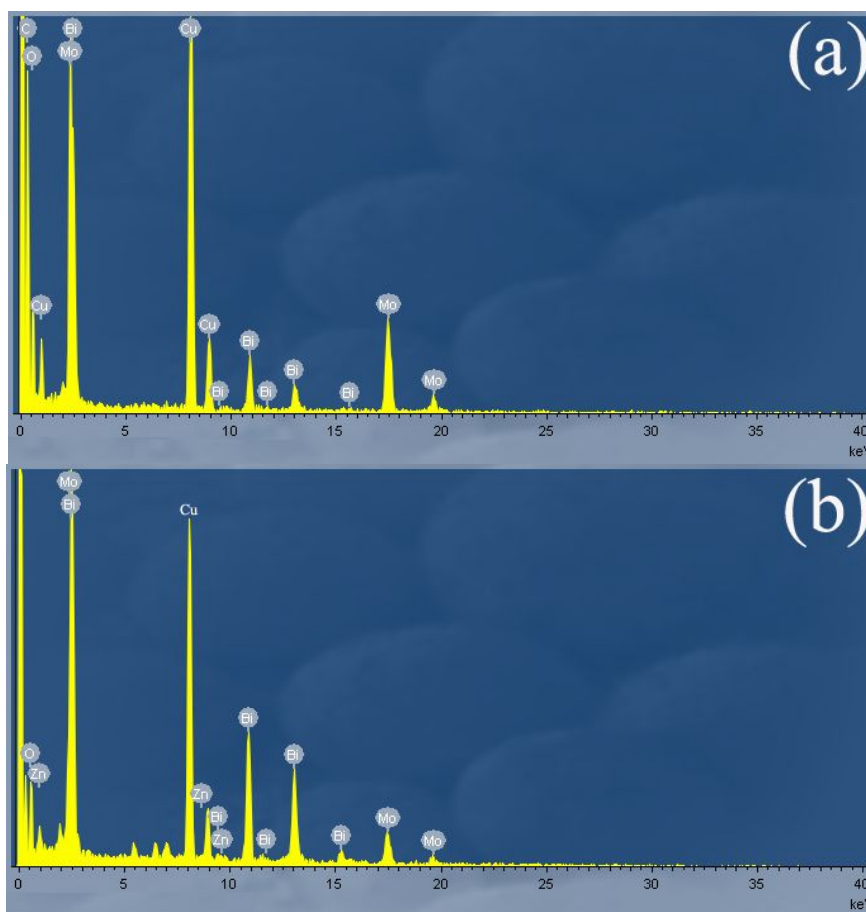

**Fig. S3** EDS spectra of pure  $\text{Bi}_2\text{MoO}_6$  (S1: a) and doped  $\text{Bi}_2\text{MoO}_6$  samples (S3: b).
